# Supplementary material
Source: PubMed Central journal article supplement (PMC2882466)
Supplement: 081164_1.pdf [file 081164_1.pdf]

## Appendix 1: Country profiles in 2005\*

| Country    | Population (in millions) <sup>1</sup> | GDP per capita (in PPP int'l \$) <sup>2</sup> | Per capita total expenditure on health (in PPP int'l \$) <sup>3</sup> | Per capita government expenditure on health (in PPP int'l \$) <sup>3</sup> | Life expectancy at birth for males/females, years <sup>4</sup> | Children under-five mortality rate per 1000 live births <sup>4</sup> | Children under five sleeping under a net, % (2003–2006) <sup>5</sup> | Children under five sleeping under an insecticide-treated net, % (2003–2006) <sup>5</sup> | Contraceptive prevalence among women using modern contraception methods among those of reproductive age (15–49) who are married or in a union, % <sup>5</sup> | Children under five with diarrhea receiving oral rehydration and continued feeding, % (2003–2006) <sup>5</sup> | Prevalence of active tuberculosis per 100 000 population <sup>4</sup> | Personal computers per population, % (2004) <sup>4</sup> | Internet users per population, % (2004) <sup>4</sup> |
|------------|---------------------------------------|-----------------------------------------------|-----------------------------------------------------------------------|----------------------------------------------------------------------------|----------------------------------------------------------------|----------------------------------------------------------------------|----------------------------------------------------------------------|-------------------------------------------------------------------------------------------|---------------------------------------------------------------------------------------------------------------------------------------------------------------|----------------------------------------------------------------------------------------------------------------|-----------------------------------------------------------------------|----------------------------------------------------------|------------------------------------------------------|
| China      | 1323                                  | 6 771                                         | 277                                                                   | 105                                                                        | 71/74                                                          | 27                                                                   |                                                                      |                                                                                           | 83.3 (1997)                                                                                                                                                   |                                                                                                                | 207.99                                                                | 4                                                        | 7                                                    |
| Ghana      | 22                                    | 2 607                                         | 95                                                                    | 40                                                                         | 58/59                                                          | 112                                                                  | 33                                                                   | 22                                                                                        | 18.7 (2003)                                                                                                                                                   | 29                                                                                                             | 379.79                                                                | 1                                                        | 2                                                    |
| India      | 1103                                  | 3 412                                         | 91                                                                    | 16                                                                         | 62/65                                                          | 56                                                                   |                                                                      |                                                                                           | 42.8 (1999)                                                                                                                                                   | 32                                                                                                             | 299.01                                                                | 3                                                        | 1                                                    |
| Iran       | 70                                    | 8 018                                         | 604                                                                   | 288                                                                        | 68/71                                                          | 36                                                                   |                                                                      |                                                                                           | 56.0 (1997)                                                                                                                                                   |                                                                                                                | 30.16                                                                 | 11                                                       | 9                                                    |
| Kazakhstan | 15                                    | 8 387                                         | 264                                                                   | 158                                                                        | 59/71                                                          | 73                                                                   |                                                                      |                                                                                           | 52.7 (1999)                                                                                                                                                   | 48                                                                                                             | 155.36                                                                |                                                          | 3                                                    |
| Laos       | 6                                     | 2 147                                         | 74                                                                    | 15                                                                         | 61/63                                                          | 79                                                                   | 82                                                                   | 18                                                                                        | 28.9 (2000)                                                                                                                                                   | 37                                                                                                             | 305.78                                                                | 0                                                        | 0                                                    |
| Mexico     | 107                                   | 10 626                                        | 655                                                                   | 304                                                                        | 72/77                                                          | 27                                                                   |                                                                      |                                                                                           | 59.5 (1997)                                                                                                                                                   |                                                                                                                | 26.93                                                                 | 11                                                       | 13                                                   |
| Pakistan   | 158                                   | 2 535                                         | 48                                                                    | 9                                                                          | 63/64                                                          | 99                                                                   |                                                                      |                                                                                           | 20.2 (2001)                                                                                                                                                   |                                                                                                                | 296.62                                                                | 0 (2001)                                                 | 7                                                    |
| Senegal    | 12                                    | 1 926                                         | 72                                                                    | 29                                                                         | 60/64                                                          | 136                                                                  | 14                                                                   | 7                                                                                         | 8.2 (1999)                                                                                                                                                    | 43                                                                                                             | 466.47                                                                | 2                                                        | 5                                                    |
| Tanzania   | 38                                    | 750                                           | 29                                                                    | 12                                                                         | 49/51                                                          | 122                                                                  | 31                                                                   | 16                                                                                        | 16.9 (1999)                                                                                                                                                   | 53                                                                                                             | 496.15                                                                | 1                                                        | 1                                                    |
| Canada     | 32                                    | 33 838                                        | 3 173                                                                 | 2 215                                                                      | 77/82                                                          | 6                                                                    |                                                                      |                                                                                           | 73.3 (1995)                                                                                                                                                   |                                                                                                                | 3.62                                                                  | 52                                                       | 55                                                   |

\*Data are for 2005 unless indicated otherwise. Canadian data are provided for comparison purposes.

### References

1. United Nations Population Division. *World population prospects: the 2004 revision*. New York (NY): Department of Economics and Social Affairs; 2005.
2. World Economic Outlook database. Washington (DC): International Monetary Fund; 2007.
3. World Health Organization. *World health statistics 2007*. Geneva (Switzerland): The Organization; 2007.
4. United Nations common database. New York (NY): United Nations Statistics Division; 2008.
5. United Nations Children's Fund. *The state of the world's children 2008*. New York (NY): United Nations; 2008.
6. United Nations Population Division. *World contraceptive use 2005* [wall chart]. New York (NY): Department of Economics and Social Affairs; 2006.
